# Supplementary material for: Salinity and alkalinity impacts on the interfacial activity of crude oil–water systems using individual and mixtures of a surface-active ionic liquid and conventional surfactant
Source: Royal Society of Chemistry journal article supplement (doi:10.1039/d5ra06324h), 2025-01-01
Supplement: d5ra06324h1.xlsx [file d5ra06324h1.xlsx]

## Sheet: Pure
Concentration	IFT	[C₁₂mim][Cl]	Concentration		SDS
1e-05	29.01		1e-05	29.01
0.0001	28.67		0.0001	26.14
0.0002	26.98		0.0002	24.42
0.0003	25.8	23.33	0.0003	23.5	21.16
0.001	21.87		0.001	19.98
0.002	18.35		0.002	15.56
0.003	16.29	15.29	0.003	13.43
0.007	12		0.007	8.12
0.01	10.18		0.01	4.56	8.56
0.02	9.89		0.02	4.12
0.025	9.71		0.025	4.03
CMC	0.0098		CMC	0.0094
	10.45			4.73

## Sheet: +Na
Concentration	IFT	[C₁₂mim][Cl]+NaCl		Concentration	IFT	SDS+NaCl
1e-05	26.4814			1e-05	26.5
0.0001	21.5	19.74		0.0001	18.95	17.15
0.0002	19.84	18.05		0.0002	16.92	15.64
0.0003	18.75	17.42		0.0003	15.66	14.97
0.001	15.48			0.001	11.55
0.002	13.52	14.52		0.002	8.4	9.81
0.003	12.03			0.003	6.24
0.007	9.22			0.007	3.62
0.01	8.32			0.01	3.61
0.02	8.19			0.02	3.35
0.025	8.13			0.025	3.32
CMC	0.0091			CMC	0.0062
	8.89				4.06
3% جرمی NaCl	جرم مولی NaCl=58	30/58	0.5 مولار

## Sheet: +OH
Concentration	IFT	[C₁₂mim][Cl]+NaCl+OH		Concentration	IFT	SDS++NaCl+OH
1e-05	26.4814			1e-05	26.4814
0.0001	21.3	18.11		0.0001	18.6	15.63
0.0002	19.3	17.43		0.0002	15.8	14.23
0.0003	18.03	16.8		0.0003	14.23
0.001	14.32			0.001	9.11	10.79
0.002	12.26			0.002	6.21	8.13
0.003	10.46			0.003	4.46
0.007	8.17			0.007	3.01
0.01	8.1			0.01	3.01
0.02	7.68			0.02	3
0.025	7.61			0.025	2.98
CMC	0.0059			CMC	0.0047
	8.32				4.03
1.5% جرمی NaOH	جرم مولی NaOH=40	15/40	0.4 مولار	گرد شدش 0.5

## Sheet: All INDV
Concentration	[C₁₂mim][Cl]	SDS	[C₁₂mim][Cl]+NaCl	SDS+NaCl	[C₁₂mim][Cl]+NaCl+OH	SDS++NaCl+OH
1e-05	29.01	29.01	26.4814	26.4814	26.4814	26.4814
0.0001	28.67	26.14	21.5	18.95	21.3	18.6
0.0002	26.98	24.42	19.84	16.92	19.3	15.8
0.0003	25.8	23.5	18.75	15.66	18.03	14.23
0.001	21.87	19.98	15.48	11.55	14.32	9.11
0.002	18.35	15.56	13.52	8.4	12.26	6.21
0.003	16.29	13.43	12.03	6.24	10.46	4.46
0.007	12	8.12	9.22	3.62	8.17	3.01
0.01	10.18	4.56	8.32	3.61	8.1	3.01
0.02	9.89	4.12	8.29	3.35	7.68	3								0.04
0.025	9.71	4.03	8.23	3.32	7.61	2.9								0.17
	CMC			Maximum IFT reduction	Synergism	Pure IFT
	(mol dm−3)	(mN m−1)	(mN m−1)	(%)	(%)	(mN m−1)
[C₁₂mim][Cl]	0.0097	10.45	9.71	66.5288	0	29.01
[C₁₂mim][Cl]+NaCl	0.0091	8.89	8.13	69.3208	16.2719	26.5
[C₁₂mim][Cl]+NaCl+OH	0.0059	8.32	7.61	71.283	21.6272	26.5
SDS	0.0094	4.73	4.03	86.1082	0	29.01
SDS+NaCl	0.0062	4.06	3.32	87.4717	17.6179	26.5
SDS++NaCl+OH	0.0047	4.03	2.9	89.0566	28.0397	26.5
Salt and alkali free
Salt
Salt-alkali

## Sheet: M, A
															min con	max con
		i	R	T		1/iRT	dG/dlnc	M(mol•m−2)	M(micromol•m−2)	NAV	Amin	Angestrom		Gemini IL concentration (mol dm−3)	1e-05	0.01
[C₁₂MIM][Cl]	[C₁₂mim][Cl]	2	8.31	298.2	4956.08	0.000201772	-2.73	0.000550838	55.0838	6.2214e+23	2.91802e-21	29.1802		ln concentration	-11.5129	-4.60517	X
	[C₁₂mim][Cl]+NaCl	2	8.31	298.2	4956.08	0.000201772	-3	0.000605317	60.5317	6.2214e+23	2.6554e-21	26.554		[C₁₂MIM][Cl]	29.01	10.18	-2.73
	[C₁₂mim][Cl]+NaCl+OH	2	8.31	298.2	4956.08	0.000201772	-3.03	0.00061137	61.137	6.2214e+23	2.6291e-21	26.291		[C₁₂MIM][Cl]+NaCl	29.01	8.32	-3
SDS	SDS	2	8.31	298.2	4956.08	0.000201772	-3.54	0.000714274	71.4274	6.2214e+23	2.25034e-21	22.5034		[C₁₂MIM][Cl]+NaCl+OH	29.01	8.1	-3.03
	SDS+NaCl	2	8.31	298.2	4956.08	0.000201772	-3.68	0.000742522	74.2522	6.2214e+23	2.16472e-21	21.6472		SDS	29.01	4.56	-3.54
	SDS++NaCl+OH	2	8.31	298.2	4956.08	0.000201772	-3.76	0.000758663	75.8663	6.2214e+23	2.11867e-21	21.1867		SDS+NaCl	29.01	3.61	-3.68
														SDS++NaCl+OH	29.01	3.01	-3.76

## Sheet: P, G
		R (j/K.mol)	T (K)	CMC (mol/dm3)	ln CMC		∆Gm (kj/mol)		Pure IFT					∆Gads (kj/mol)
[C₁₂MIM][Cl]	[C₁₂mim][Cl]	8.314	298.2	0.0097	-4.63563	1000	-11.4928	10.45	29.01	18.56	0.01856	0.550838	0.0336941	-11.5265
	[C₁₂mim][Cl]+NaCl	8.314	298.2	0.0091	-4.69948	1000	-11.6511	8.89	26.5	17.61	0.01761	0.605317	0.0290922	-11.6802
	[C₁₂mim][Cl]+NaCl+OH	8.314	298.2	0.0059	-5.1328	1000	-12.7254	8.32	26.5	18.18	0.01818	0.61137	0.0297365	-12.7552
SDS	SDS	8.314	298.2	0.0094	-4.66705	1000	-11.5707	4.73	29.01	24.28	0.02428	0.714274	0.0339926	-11.6047
	SDS+NaCl	8.314	298.2	0.0062	-5.08321	1000	-12.6025	4.06	26.5	22.44	0.02244	0.742522	0.0302213	-12.6327
	SDS++NaCl+OH	8.314	298.2	0.0047	-5.36019	1000	-13.2892	4.03	26.5	22.47	0.02247	0.758663	0.0296179	-13.3188
