# Supplementary material for: Salinity and alkalinity impacts on the interfacial activity of crude oil–water systems using individual and mixtures of a surface-active ionic liquid and conventional surfactant
Source: Royal Society of Chemistry journal article supplement (doi:10.1039/d5ra06324h), 2025-01-01
Supplement: d5ra06324h2.xlsx [file d5ra06324h2.xlsx]

## Sheet: IL;SDS
	Log	SDS		Mole fraction		IL
IL:SDS (Con)	IL:SDS (Con)	0	0.3	0.5	0.7	1
0.0001	-4	26.14	11.74	13.65	15.68	28.67
0.0002	-3.69897	24.42	11.03	12.56	14.59	26.98
0.001	-3	19.98	7.42	9.31	10.69	21.87
0.002	-2.69897	15.56	3.55	6.25	8.36	18.35
0.003	-2.52288	13.43	2.35	3.88	5.96	16.29
0.007	-2.1549	8.12	1.98	2.56	3.24	12
0.01	-2	4.56	1.81	2.44	3.17	10.18
0.02	-1.69897	4.12	1.62	2.18	2.93	9.89
0.0001 (mol.dm⁻³)
ɑ	CMC
0	0.0094	SDS
0.3	0.0027	2.41
0.5	0.0037	3.62
0.7	0.0068	3.35
1	0.0098	IL
avarage of individual in 0.3		0.00968
maximum reduction in 0.3		72.1074
																	σ (mN/m)	C°1 IL (mol/l)		C°2 SDS (mol/l)		C12 (0/3) (mol/l)		C12 (0/5) (mol/l)		C12 (0/7) (mol/l)
																		log	ant log	log	ant log	log	ant log	log	ant log	log	ant log
																	20	-2.85	0.00141254	-3.03	0.000933254	-5.09	8.12831e-06	-4.7	1.99526e-05	-4	0.0001
																	15	-2.42	0.00380189	-2.65	0.00223872	-4.28	5.24807e-05	-4.1	7.94328e-05	-3.51	0.00030903
																	10	-1.95	0.0112202	-2.29	0.00512861	-3.62	0.000239883	-3.29	0.000512861	-3.02	0.000954993
																	5	-1.53	0.0295121	-2.04	0.00912011	-2.88	0.00131826	-2.63	0.00234423	-2.42	0.00380189

## Sheet: IL;SDS+Na
	Log	SDS		Mole fraction		IL
IL:SDS (Con)	IL:SDS (Con)	0	0.3	0.5	0.7	1
0.0001	-4	18.95	12.89	14.66	16.45	21.5
0.0002	-3.69897	16.92	10.5	12.1	13.9	19.84
0.0003	-3.52288	15.66	9.06	10.97	12.23	18.75
0.001	-3	11.55	5.56	7.51	9.04	15.48
0.002	-2.69897	8.4	2.7	4.72	6.78	13.52
0.003	-2.52288	6.24	2	2.95	5.7	12.03
0.007	-2.1549	3.62	1.7	2.15	3	9.22
0.01	-2	3.61	1.65	2.12	2.98	8.32
0.02	-1.69897					8.29
0.0001 (mol.dm⁻³)
ɑ	CMC
0	0.0062	SDS
0.3	0.0023	2.39
0.5	0.0036	2.7
0.7	0.0065	3.1
1	0.0091	IL
avarage of individual in 0.3		0.00823
maximum reduction in 0.3		72.0535
																	σ (mN/m)	C°1 IL (mol/l)		C°2 SDS (mol/l)		C12 (0/3) (mol/l)		C12 (0/5) (mol/l)		C12 (0/7) (mol/l)
																		log	ant log	log	ant log	log	ant log	log	ant log	log	ant log
																	20	-3.72	0.000190546	-4.11	7.76247e-05	-5	1e-05	-4.83	1.47911e-05	-4.7	1.99526e-05
																	15	-2.92	0.00120226	-3.43	0.000371535	-4.16	6.91831e-05	-4.02	9.54993e-05	-3.81	0.000154882
																	10	-2.26	0.00549541	-2.85	0.00141254	-3.54	0.000288403	-3.38	0.000416869	-3.17	0.000676083
																	5	-1.55	0.0281838	-2.35	0.00446684	-2.94	0.00114815	-2.63	0.00234423	-2.42	0.00380189

## Sheet: IL;SDS+OH
	Log	SDS		Mole fraction		IL
IL:SDS (Con)	IL:SDS (Con)	0	0.3	0.5	0.7	1
0.0001	-4	18.6	10.4	12.21	14	21.3
0.0002	-3.69897	15.8	8.17	10.34	12.32	19.3
0.0003	-3.52288	14.23	6.29	8.62	10.85	18.03
0.001	-3	9.11	1.53	3.33	6.45	14.32
0.002	-2.69897	6.21	0.43	1.12	4.3	12.26
0.003	-2.52288	4.46	0.31	1.03	2.63	10.46
0.007	-2.1549	3.01	0.26	0.91	1.63	8.17
0.01	-2	3.01	0.24	0.88	1.55	8.1
0.0001 (mol.dm⁻³)
ɑ	CMC
0	0.0047	SDS
0.3	0.0015	0.98
0.5	0.0019	1.27
0.7	0.0039	2.33
1	0.0059	IL
avarage of individual in 0.3		0.00554
maximum reduction in 0.3		72.9242
																	σ (mN/m)	C°1 IL (mol/l)		C°2 SDS (mol/l)		C12 (0/3) (mol/l)		C12 (0/5) (mol/l)		C12 (0/7) (mol/l)
																		log	ant log	log	ant log	log	ant log	log	ant log	log	ant log
																	20	-3.8	0.000158489	-4.13	7.4131e-05	-5.22	6.0256e-06	-5.096	8.01678e-06	-5	1e-05
																	15	-3	0.001	-3.6	0.000251189	-4.51	3.0903e-05	-4.31	4.89779e-05	-4.1	7.94328e-05
																	10	-2.44	0.00363078	-3.09	0.000812831	-3.95	0.000112202	-3.67	0.000213796	-3.42	0.000380189
																	5	-1.77	0.0169824	-2.58	0.00263027	-3.39	0.00040738	-3.05	0.000891251	-2.81	0.00154882
	Salt and alkali free	Salt	Salt-alkali
0	13.43	6.24	4.46
0.3	2.35	2	0.31
0.5	3.88	2.95	1.03
0.7	5.96	5.7	2.63
1	16.29	12.03	10.46

## Sheet: Synergism
Pure	SDS											IL
IL:SDS (Con)	0	Synergism	0.3	Avarage	Synergism	0.5	Avarage	Synergism	0.7	Avarage	Synergism	1	Synergism
0.0001	26.14	0	11.74	26.899	56.3553	13.65	27.405	50.1916	15.68	27.911	43.8214	28.67	0
0.0002	24.42	0	11.03	25.188	56.2093	12.56	25.7	51.1284	14.59	26.212	44.3385	26.98	0
0.001	19.98	0	7.42	20.547	63.8877	9.31	20.925	55.5078	10.69	21.303	49.8193	21.87	0
0.002	15.56	0	3.55	16.397	78.3497	6.25	16.955	63.1377	8.36	17.513	52.264	18.35	0
0.003	13.43	0	2.35	14.288	83.5526	3.88	14.86	73.8896	5.96	15.432	61.379	16.29	0
0.007	8.12	0	1.98	9.284	78.673	2.56	10.06	74.5527	3.24	10.836	70.0997	12	0
0.01	4.56	0	1.81	6.246	71.0215	2.44	7.37	66.8928	3.17	8.494	62.6795	10.18	0
0.02	4.12	0	1.62	5.851	72.3124	2.18	7.005	68.8794	2.93	8.159	64.0887	9.89	0
with Na	SDS											IL
IL:SDS (Con)	0	Synergism	0.3	Avarage	Synergism	0.5	Avarage	Synergism	0.7	Avarage	Synergism	1	Synergism
0.0001	18.95	0	12.89	19.715	34.6183	14.66	20.225	27.5155	16.45	20.735	20.6655	21.5	0
0.0002	16.92	0	10.5	17.796	40.998	12.1	18.38	34.1676	13.9	18.964	26.7032	19.84	0
0.0003	15.66	0	9.06	16.587	45.3789	10.97	17.205	36.2395	12.23	17.823	31.3808	18.75	0
0.001	11.55	0	5.56	12.729	56.3202	7.51	13.515	44.4321	9.04	14.301	36.7876	15.48	0
0.002	8.4	0	2.7	9.936	72.8261	4.72	10.96	56.9343	6.78	11.984	43.4246	13.52	0
0.003	6.24	0	2	7.977	74.9279	2.95	9.135	67.7066	5.7	10.293	44.6226	12.03	0
0.007	3.62	0	1.7	5.3	67.9245	2.15	6.42	66.5109	3	7.54	60.2122	9.22	0
0.01	3.61	0	1.65	5.023	67.1511	2.12	5.965	64.4593	2.98	6.907	56.8554	8.32	0
wit Na+OH	SDS											IL
IL:SDS (Con)	0	Synergism	0.3	Avarage	Synergism	0.5	Avarage	Synergism	0.7	Avarage	Synergism	1	Synergism
0.0001	18.6	0	10.4	19.41	46.4194	12.21	19.95	38.797	14	20.49	31.674	21.3	0
0.0002	15.8	0	8.17	16.85	51.5134	10.34	17.55	41.0826	12.32	18.25	32.4932	19.3	0
0.0003	14.23	0	6.29	15.37	59.0761	8.62	16.13	46.5592	10.85	16.89	35.7608	18.03	0
0.001	9.11	0	1.53	10.673	85.6648	3.33	11.715	71.5749	6.45	12.757	49.4395	14.32	0
0.002	6.21	0	0.43	8.025	94.6417	1.12	9.235	87.8722	4.3	10.445	58.832	12.26	0
0.003	4.46	0	0.31	6.26	95.0479	1.03	7.46	86.193	2.63	8.66	69.6305	10.46	0
0.007	3.01	0	0.26	4.558	94.2957	0.91	5.59	83.7209	1.63	6.622	75.3851	8.17	0
0.01	3.01	0	0.24	4.537	94.7102	0.88	5.555	84.1584	1.55	6.573	76.4187	8.1	0

## Sheet: Max sinergy
0.3
IL:SDS (Con)	Salt and alkali free	Salt	Salt-alkali
0.0001	56.3553	34.6183	46.4194
0.0002	56.2093	40.998	51.5134
0.001	63.8877	56.3202	85.6648
0.002	78.3497	72.8261	94.6417
0.003	83.5526	74.9279	95.0479
0.007	78.673	67.9245	94.2957
0.01	71.0215	67.1511	94.7102

## Sheet: CMC comparision
		Salt and alkali free			Salt			Salt-alkali
α1	CMC	Synergy		CMC	Synergy		CMC	Synergy
0	0.0094	0	4.73	0.0062	0	4.06	0.0047	0	4.03
0.3	0.0027	71.549	2.41	0.0023	67.4682	2.39	0.0015	70.3557	0.98
0.5	0.0037	61.2565	3.62	0.0036	52.9412	2.7	0.0019	64.1509	1.27
0.7	0.0068	29.2404	3.35	0.0065	21.0207	3.1	0.0039	29.6029	2.33
1	0.0097	0	10.45	0.0091	0	8.89	0.0059	0	8.32

## Sheet: X, B Pure
σ (mN/m)	C°1 IL (mol/l)	C°2 SDS (mol/l)	C12 (0/3) (mol/l)	C12 (0/5) (mol/l)	C12 (0/7) (mol/l)
20	0.00141254	0.000933254	8e-06	2e-05	0.0001
15	0.00380189	0.00223872	5.24807e-05	8e-05	0.0003
10	0.0112202	0.00512861	0.000239883	0.000512861	0.000954993
5	0.0295121	0.00912011	0.00131826	0.00234423	0.00380189
		σ (mN/m)		σ (mN/m)		σ (mN/m)		σ (mN/m)
α	X1	20	X1	15	X1	10	X1	5
0.3	0.4716	1.00078	0.4625	1.00069	0.45	1.00861	0.4166	1.00032
0.5	0.4887	1.00082	0.4839	1.0007	0.47	1.00716	0.44	1.00875
0.7	0.5179	1.0001	0.5139	1.00013	0.5031	1.00071	0.481	1.01041
α	ß		ß		ß		ß
0.3	-20.1501		-16.3225		-14.0522		-10.0978
0.5	-16.1978		-14.3734		-10.7639		-7.66904
0.7	-10.0967		-9.43921		-8.64071		-6.21503

## Sheet: X, B Na
σ (mN/m)	C°1 IL (mol/l)	C°2 SDS (mol/l)	C12 (0/3) (mol/l)	C12 (0/5) (mol/l)	C12 (0/7) (mol/l)
20	0.000190546	7.76247e-05	1e-05	1.5e-05	2e-05
15	0.00120226	0.000371535	6.91831e-05	9.54993e-05	0.000154882
10	0.00549541	0.00141254	0.00029	0.000416869	0.000676083
5	0.0281838	0.00446684	0.00114815	0.00234423	0.00380189
		σ (mN/m)		σ (mN/m)		σ (mN/m)		σ (mN/m)
α	X1	20	X1	15	X1	10	X1	5
0.3	0.428	1.00094	0.4088	1.00078	0.3996	1.00022	0.376	1.00038
0.5	0.4564	1.00001	0.4392	1.00049	0.4279	1.00037	0.383	1.00061
0.7	0.4974	1.0005	0.4801	1.00081	0.468	1.00021	0.424	1.00039
α	ß		ß		ß		ß
0.3	-10.0942		-9.05434		-8.95602		-8.79972
0.5	-8.29305		-7.64139		-7.40357		-5.83211
0.7	-7.57096		-6.18661		-5.98091		-4.52686

## Sheet: X, B OH
σ (mN/m)	C°1 IL (mol/l)	C°2 SDS (mol/l)	C12 (0/3) (mol/l)	C12 (0/5) (mol/l)	C12 (0/7) (mol/l)
20	0.000158489	7.4131e-05	6e-06	8e-06	1e-05
15	0.001	0.000251189	3e-05	4.89779e-05	7.94328e-05
10	0.00363078	0.000812831	0.000106	0.000213796	0.000380189
5	0.0169824	0.00263027	0.00040738	0.0009	0.00154882
		σ (mN/m)		σ (mN/m)		σ (mN/m)		σ (mN/m)
α	X1	20	X1	15	X1	10	X1	5
0.3	0.4416	1.00056	0.416	1.00068	0.4105	1.00018	0.3957	1.00002
0.5	0.4694	1.00082	0.438	1.00001	0.4262	1.00084	0.4038	1.00086
0.7	0.5037	1.00019	0.473	1.00577	0.4611	1.00059	0.4371	1.00092
α	ß		ß		ß		ß
0.3	-11.7397		-11.24		-11.0712		-10.9729
0.5	-10.3826		-9.13108		-8.11696		-7.66301
0.7	-9.88172		-7.70844		-6.33259		-6.07143
								کسر مولی جذب سطحی شده جز آ با افزایش نسبت مولی در سطح مشترک افزایش می یابد اما نه به اندازه نسبت مولی که نشان دهنده جذب بیشتر جز بی و فعالیت سطحی بیشتر آن می باشد
								بتا خالص منفی تر از حضور نمک و قلیا می باشد که نشان دهنده خنثی شدن بهتر سورفکتانت ها بدون حضور یون های دیگر باردار می باشد
								بتا در حضور قلیا منفی تر است نسبت به نمک که نشان دهنده خنثی شدن بار سدیم مثبت توسط قلیا می باشد
